# Supplementary material
Source: PubMed Central journal article supplement (PMC8075288)
Supplement: NIHMS1066084-supplement-1.pdf [file NIHMS1066084-supplement-1.pdf]

**Supplemental Table S1**  
**Levels of Nicotine, Minor Alkaloids, and Beta-carbolines in Cigarette Smoke (ISO Regimen)**

| Cigarette variety                          | Nicotine, mg/cigarette | Minor alkaloids, µg/cigarette |                  |                  | Beta-carbolines, µg/cigarette |                  |
|--------------------------------------------|------------------------|-------------------------------|------------------|------------------|-------------------------------|------------------|
|                                            |                        | Nornicotine                   | Anatabine        | Anabasine        | Harman                        | Norharman        |
| <b>Natural American Spirit<sup>a</sup></b> |                        |                               |                  |                  |                               |                  |
| Black                                      | 1.8                    | 8.3                           | 6.0              | 1.6              | 1.8                           | 5.5              |
| Blue                                       | 1.7                    | 6.4                           | 5.3              | 1.0              | 1.8                           | 4.9              |
| Celadon                                    | 1.3                    | 4.2                           | 3.4              | 0.7              | 1.3                           | 3.7              |
| Dark Blue                                  | 1.9                    | 7.0                           | 4.2              | 1.0              | 1.7                           | 4.7              |
| Dark Green                                 | 2.1                    | 12.8                          | 8.2              | 2.0              | 2.3                           | 6.1              |
| Gold                                       | 1.2                    | 5.8                           | 3.9              | 0.9              | 0.9                           | 2.2              |
| Green                                      | 1.6                    | 6.8                           | 5.1              | 1.3              | 1.5                           | 4.2              |
| Gray                                       | 1.3                    | 5.5                           | 3.4              | 0.8              | 1.1                           | 3.7              |
| Orange                                     | 0.6                    | 2.0                           | 1.4              | 0.5              | 0.5                           | 1.5              |
| Tan                                        | 1.2                    | 5.2                           | 2.8              | 0.7              | 1.1                           | 2.9              |
| Turquoise                                  | 1.7                    | 9.4                           | 7.1              | 1.8              | 1.6                           | 4.4              |
| Yellow                                     | 1.5                    | 6.7                           | 4.3              | 1.2              | 1.6                           | 4.5              |
| Brown (non-filter)                         | 2.4                    | 10.1                          | 7.6              | 1.7              | 2.7                           | 7.3              |
| <i>Average (SD), filter</i>                | <i>1.5 (0.4)</i>       | <i>6.7 (2.7)</i>              | <i>4.6 (1.9)</i> | <i>1.1 (0.5)</i> | <i>1.4 (0.5)</i>              | <i>4.0 (1.3)</i> |
| <i>Average (SD), all NAS</i>               | <i>1.6 (0.5)</i>       | <i>6.9 (2.8)</i>              | <i>4.8 (2.0)</i> | <i>1.2 (0.5)</i> | <i>1.5 (0.6)</i>              | <i>4.3 (1.6)</i> |
| <b>Other Brands<sup>a</sup></b>            |                        |                               |                  |                  |                               |                  |
| Newport Menthol                            | 1.1                    | 9.1                           | 5.6              | 1.2              | 2.0                           | 6.6              |
| Marlboro Red                               | 0.8                    | 6.3                           | 4.8              | 1.0              | 1.7                           | 5.9              |
| Marlboro Gold                              | 0.7                    | 6.2                           | 4.5              | 1.0              | 1.6                           | 5.7              |
| Camel Filter                               | 1.1                    | 6.1                           | 4.7              | 1.0              | 2.1                           | 7.0              |
| Camel Non-Filter                           | 1.5                    | 9.2                           | 7.1              | 1.5              | 3.8                           | 12.4             |
| <i>Average (SD), filter</i>                | <i>0.9 (0.2)</i>       | <i>6.9 (1.5)</i>              | <i>4.9 (0.5)</i> | <i>1.1 (0.1)</i> | <i>1.8 (0.2)</i>              | <i>6.3 (0.6)</i> |
| <i>Average (SD), all other</i>             | <i>1.0 (0.3)</i>       | <i>7.4 (1.6)</i>              | <i>5.3 (1.1)</i> | <i>1.1 (0.2)</i> | <i>2.2 (0.9)</i>              | <i>7.5 (2.8)</i> |
| <b>Reference Cigarettes<sup>b</sup></b>    |                        |                               |                  |                  |                               |                  |
| 1R5F                                       | 0.2                    | 2.1                           | 1.7              | 0.6              | 0.3                           | 0.8              |
| 3R4F                                       | 0.6                    | 5.7                           | 3.6              | 0.5              | 0.8                           | 2.2              |

**Note.****a:** Values are averages of triplicate analyses.**b:** Values are from single analysis.

**Supplemental Table S2**  
**Levels of Tobacco-specific *N*-nitrosamines (TSNA) in Cigarette Smoke (ISO Regimen)**

| Cigarette Variety                          | TSNA, ng/cigarette |                 |                 |                 |                 |
|--------------------------------------------|--------------------|-----------------|-----------------|-----------------|-----------------|
|                                            | NNN                | NNK             | NAT             | NAB             | Total           |
| <b>Natural American Spirit<sup>a</sup></b> |                    |                 |                 |                 |                 |
| Black                                      | 110                | 39              | 94              | 24              | 268             |
| Blue                                       | 41                 | 31              | 73              | 9.9             | 155             |
| Celadon                                    | 15                 | 19              | 30              | 3.6             | 67              |
| Dark Blue                                  | 17                 | 21              | 39              | 4.8             | 82              |
| Dark Green                                 | 48                 | 25              | 84              | 15              | 172             |
| Gold                                       | 25                 | 22              | 47              | 10              | 104             |
| Green                                      | 30                 | 25              | 52              | 10              | 117             |
| Gray                                       | 113                | 35              | 68              | 19              | 235             |
| Orange                                     | 7.1                | 9.2             | 17              | 2.7             | 36              |
| Tan                                        | 9.3                | 11              | 23              | 3.1             | 46              |
| Turquoise                                  | 40                 | 33              | 76              | 15              | 164             |
| Yellow                                     | 19                 | 20              | 37              | 5.4             | 81              |
| Brown (non-filter)                         | 28                 | 25              | 63              | 8.1             | 124             |
| <i>Average (SD), filter</i>                | <i>40 (36)</i>     | <i>24 (9)</i>   | <i>53 (25)</i>  | <i>10 (6.8)</i> | <i>127 (73)</i> |
| <i>Average (SD), all NAS</i>               | <i>39 (35)</i>     | <i>24 (9)</i>   | <i>54 (24)</i>  | <i>10 (6.6)</i> | <i>127 (70)</i> |
| <b>Other Brands<sup>a</sup></b>            |                    |                 |                 |                 |                 |
| Newport Menthol                            | 147                | 95              | 193             | 33              | 468             |
| Marlboro Red                               | 165                | 121             | 235             | 38              | 558             |
| Marlboro Gold                              | 142                | 105             | 193             | 31              | 471             |
| Camel Filter                               | 117                | 113             | 185             | 34              | 448             |
| Camel Non-Filter                           | 162                | 71              | 292             | 50              | 575             |
| <i>Average (SD), filter</i>                | <i>143 (20)</i>    | <i>108 (11)</i> | <i>201 (23)</i> | <i>34 (3)</i>   | <i>486 (49)</i> |
| <i>Average (SD), all other</i>             | <i>147 (19)</i>    | <i>101 (19)</i> | <i>219 (45)</i> | <i>37 (8)</i>   | <i>504 (58)</i> |
| <b>Reference Cigarettes<sup>b</sup></b>    |                    |                 |                 |                 |                 |
| 1R5F                                       | 59                 | 34              | 81              | 12              | 186             |
| 3R4F                                       | 132                | 103             | 184             | 22              | 440             |

**Note.****a:** Values are averages of triplicate analyses.**b:** Values are from single analysis.**c:** NNN, *N*'-nitrosornicotine; NNK, 4-(methylnitrosamino)-1-(3-pyridyl)-1-butane; NAT, *N*'-nitrosoanatabine; NAB, *N*'-nitrosoanabasine

**Supplemental Table S3**  
**Levels of Polycyclic Aromatic Hydrocarbons (PAH) in Cigarette Smoke (ISO Regimen)<sup>a</sup>**

| Cigarette variety              | PAH, ng/cigarette |                 |               |                |                |               |                  |                  |                   |                  |                  | Total PAH        |
|--------------------------------|-------------------|-----------------|---------------|----------------|----------------|---------------|------------------|------------------|-------------------|------------------|------------------|------------------|
|                                | PHE               | ANT             | PY            | B[a]A          | CHR            | B[b+j]F       | B[k]F            | B[e]P            | B[a]P             | IcdP             | DBahA            |                  |
| <b>Natural American Spirit</b> |                   |                 |               |                |                |               |                  |                  |                   |                  |                  |                  |
| Black                          | 280               | 124             | 38            | 38             | 55             | 20            | 3.0              | 7.1              | 17.9              | 7.2              | 6.4              | 597              |
| Blue                           | 318               | 125             | 41            | 41             | 59             | 22            | 3.9              | 8.4              | 20.8              | 8.9              | 6.8              | 655              |
| Celadon                        | 205               | 98              | 39            | 28             | 41             | 17            | 2.5              | 5.6              | 14.9              | 6.0              | 5.7              | 462              |
| Dark Blue                      | 215               | 97              | 33            | 27             | 41             | 15            | 2.2              | 5.4              | 13.6              | 6.5              | 4.5              | 460              |
| Dark Green                     | 254               | 128             | 45            | 39             | 54             | 24            | 3.7              | 7.9              | 18.6              | 7.6              | 5.9              | 589              |
| Gold                           | 130               | 60              | 23            | 15             | 23             | 10            | 1.4              | 3.6              | 8.0               | 2.6              | 4.5              | 281              |
| Green                          | 214               | 91              | 41            | 26             | 39             | 16            | 4.6              | 5.8              | 12.5              | 5.7              | 4.6              | 460              |
| Gray                           | 204               | 83              | 32            | 27             | 39             | 15            | 2.4              | 4.9              | 13.1              | 5.7              | 5.3              | 431              |
| Orange                         | 139               | 60              | 27            | 16             | 25             | 10            | 2.3              | 3.6              | 8.1               | 3.2              | 5.5              | 299              |
| Tan                            | 174               | 73              | 30            | 22             | 32             | 12            | 2.3              | 4.2              | 11.2              | 4.8              | 3.8              | 371              |
| Turquoise                      | 179               | 94              | 30            | 23             | 34             | 14            | 1.9              | 4.7              | 11.5              | 4.4              | 5.2              | 402              |
| Yellow                         | 213               | 99              | 37            | 29             | 39             | 18            | 3.4              | 5.7              | 13.7              | 6.2              | 5.5              | 468              |
| Brown (non-filter)             | 480               | 203             | 53            | 74             | 103            | 41            | 7.7              | 14.5             | 34.8              | 17.3             | 8.6              | 1038             |
| <i>Average (SD), filter</i>    | <i>210 (54)</i>   | <i>94 (23)</i>  | <i>35 (7)</i> | <i>28 (8)</i>  | <i>40 (11)</i> | <i>16 (4)</i> | <i>2.8 (0.9)</i> | <i>5.6 (1.6)</i> | <i>13.7 (3.9)</i> | <i>5.7 (1.8)</i> | <i>5.3 (0.9)</i> | <i>456 (114)</i> |
| <i>Average (SD), all NAS</i>   | <i>231 (91)</i>   | <i>103 (37)</i> | <i>36 (8)</i> | <i>31 (15)</i> | <i>45 (21)</i> | <i>18 (8)</i> | <i>3.2 (1.6)</i> | <i>6.3 (2.9)</i> | <i>15.3 (6.9)</i> | <i>6.6 (3.6)</i> | <i>5.6 (1.2)</i> | <i>501 (195)</i> |
| <b>Other Brands</b>            |                   |                 |               |                |                |               |                  |                  |                   |                  |                  |                  |
| Newport Menthol                | 161               | 65              | 39            | 22             | 28             | 19            | 3.4              | 5.6              | 11.2              | 5.9              | 3.7              | 363              |
| Marlboro Red                   | 148               | 65              | 31            | 17             | 24             | 12            | 2.0              | 4.3              | 9.7               | 4.2              | 3.2              | 321              |
| Marlboro Gold                  | 144               | 60              | 31            | 17             | 24             | 13            | 2.1              | 4.1              | 8.8               | 4.1              | 3.0              | 311              |
| Camel Filter                   | 202               | 86              | 42            | 25             | 36             | 19            | 3.6              | 6.0              | 13.2              | 6.1              | 4.3              | 442              |
| Camel Non-Filter               | 279               | 114             | 47            | 34             | 43             | 22            | 3.8              | 6.8              | 15.9              | 8.1              | 4.8              | 578              |
| <i>Average (SD), filter</i>    | <i>164 (27)</i>   | <i>69 (12)</i>  | <i>36 (6)</i> | <i>20 (4)</i>  | <i>28 (6)</i>  | <i>16 (4)</i> | <i>2.8 (0.8)</i> | <i>5.0 (0.9)</i> | <i>10.7 (1.9)</i> | <i>5.1 (1.1)</i> | <i>3.6 (0.6)</i> | <i>359 (60)</i>  |
| <i>Average (SD), all other</i> | <i>187 (56)</i>   | <i>78 (22)</i>  | <i>38 (7)</i> | <i>23 (7)</i>  | <i>31 (8)</i>  | <i>17 (4)</i> | <i>3.0 (0.9)</i> | <i>5.4 (1.1)</i> | <i>11.8 (2.9)</i> | <i>5.7 (1.6)</i> | <i>3.8 (0.8)</i> | <i>403 (111)</i> |
| <b>Reference Cigarettes</b>    |                   |                 |               |                |                |               |                  |                  |                   |                  |                  |                  |
| 1R5F                           | 42                | 16              | 10            | 4.0            | 5.0            | 5.0           | 0.6              | 1.2              | 2.7               | 0.5              | 1.0              | 87               |
| 3R4F                           | 116               | 47              | 25            | 13             | 18             | 11            | 1.4              | 2.7              | 6.7               | 3.1              | 2.3              | 247              |

**Note.**

a: All values are averages of triplicate analyses.

PHE, phenanthrene; ANT, anthracene; PY, pyrene; B[a]A, benz[a]anthracene; CHR, chrysene; B[b+j]F, benzo[b]fluoranthene plus benzo[j]fluoranthene; B[k]F, benzo[k]fluoranthene; B[e]P, benzo[e]pyrene; B[a]P, benzo[a]pyrene; IcdP, indeno[1,2,3-cd]pyrene; DB[ah]A, dibenz[a,h]anthracene

**Supplemental Table S4**  
**Levels of Carbonyl Compounds in Cigarette Smoke (ISO Regimen)<sup>a</sup>**

| Cigarette Variety              | Carbonyl compounds, µg/cigarette |                  |                 |                |                 |                |                |               | Total             |
|--------------------------------|----------------------------------|------------------|-----------------|----------------|-----------------|----------------|----------------|---------------|-------------------|
|                                | Formaldehyde                     | Acetaldehyde     | Acetone         | Acrolein       | Propionaldehyde | Crotonaldehyde | Butanone       | Butyraldehyde |                   |
| <b>Natural American Spirit</b> |                                  |                  |                 |                |                 |                |                |               |                   |
| Black                          | 29                               | 768              | 298             | 40             | 53              | 22             | 74             | 40            | 1324              |
| Blue                           | 33                               | 921              | 341             | 62             | 67              | 22             | 93             | 46            | 1586              |
| Celadon                        | 21                               | 613              | 223             | 33             | 42              | 14             | 57             | 28            | 1032              |
| Dark Blue                      | 30                               | 684              | 250             | 36             | 45              | 18             | 72             | 29            | 1165              |
| Dark Green                     | 26                               | 870              | 330             | 48             | 55              | 18             | 72             | 39            | 1459              |
| Gold                           | 9.0                              | 477              | 202             | 23             | 36              | 11             | 50             | 26            | 834               |
| Green                          | 13                               | 588              | 207             | 32             | 43              | 13             | 52             | 29            | 976               |
| Gray                           | 24                               | 578              | 226             | 32             | 41              | 18             | 52             | 24            | 995               |
| Orange                         | 13                               | 563              | 237             | 21             | 37              | 13             | 85             | 32            | 1002              |
| Tan                            | 30                               | 679              | 257             | 46             | 49              | 18             | 65             | 36            | 1179              |
| Turquoise                      | 15                               | 631              | 241             | 33             | 46              | 14             | 58             | 28            | 1066              |
| Yellow                         | 25                               | 696              | 274             | 39             | 50              | 18             | 68             | 36            | 1207              |
| Brown (non-filter)             | 75                               | 964              | 388             | 64             | 71              | 36             | 106            | 55            | 1759              |
| <i>Average (SD), filter</i>    | <i>22 (8)</i>                    | <i>672 (129)</i> | <i>257 (45)</i> | <i>37 (11)</i> | <i>47 (9)</i>   | <i>17 (4)</i>  | <i>67 (14)</i> | <i>33 (7)</i> | <i>1152 (217)</i> |
| <i>Average (SD), all NAS</i>   | <i>26 (17)</i>                   | <i>695 (147)</i> | <i>267 (57)</i> | <i>39 (13)</i> | <i>49 (11)</i>  | <i>18 (6)</i>  | <i>70 (17)</i> | <i>34 (9)</i> | <i>1199 (267)</i> |
| <b>Other Brands</b>            |                                  |                  |                 |                |                 |                |                |               |                   |
| Newport Menthol                | 30                               | 941              | 284             | 60             | 56              | 31             | 62             | 33            | 1496              |
| Marlboro Red                   | 24                               | 631              | 208             | 54             | 43              | 13             | 51             | 25            | 1048              |
| Marlboro Gold                  | 22                               | 652              | 217             | 58             | 37              | 17             | 62             | 24            | 1088              |
| Camel Filter                   | 25                               | 767              | 269             | 49             | 47              | 19             | 68             | 31            | 1274              |
| Camel Non-Filter               | 62                               | 796              | 273             | 60             | 48              | 25             | 71             | 26            | 1362              |
| <i>Average (SD), filter</i>    | <i>25 (3)</i>                    | <i>748 (142)</i> | <i>245 (38)</i> | <i>55 (5)</i>  | <i>46 (8)</i>   | <i>20 (8)</i>  | <i>61 (7)</i>  | <i>28 (4)</i> | <i>1227 (205)</i> |
| <i>Average (SD), all other</i> | <i>33 (17)</i>                   | <i>757 (125)</i> | <i>250 (35)</i> | <i>56 (5)</i>  | <i>46 (7)</i>   | <i>21 (7)</i>  | <i>63 (8)</i>  | <i>28 (4)</i> | <i>1254 (187)</i> |
| <b>Reference Cigarettes</b>    |                                  |                  |                 |                |                 |                |                |               |                   |
| 1R5F                           | 3.0                              | 232              | 180             | 10             | 18              | 2.0            | 28             | 10            | 482               |
| 3R4F                           | 18                               | 663              | 277             | 42             | 45              | 13             | 60             | 23            | 1141              |

Note.

a: All values are means of duplicate analyses.
